# Supplementary material
Source: PubMed Central journal article supplement (PMC2755711)

## SUPPLEMENTARY FIGURE LEGENDS

Suppl. Fig. S1. Biochemical characterization of the FKBP38:PHD2 interaction. Fluorescence spectra of 1  $\mu$ M FKBP38 (—), 1.25  $\mu$ M PHD2<sup>170-426</sup> (....) and a 1:1 mixture of both proteins (----) at an excitation wavelength of 278 nm. The calculated spectrum (---) represents the sum of the individual protein spectra, as it should appear when the fluorescence of the proteins is not affected by the addition of a potential interaction partner. Here, it overlaps with the 1:1 mixture of both proteins (----).

Suppl. Fig. S2. PHD2 protein stability. HeLa cells were treated with 100  $\mu$ M CHX and incubated for 24, 48 or 72 hr at 20% O<sub>2</sub> or 0.2% O<sub>2</sub>. PHD2 protein levels were analyzed by immunoblotting and quantified by densitometry. Results are mean values of relative intensities (PHD2/ $\beta$ -actin) normalized to time point 0  $\pm$  SEM of n=3 independent experiments.

Suppl. Fig. S3. Indirect immunofluorescence of FKBP38 and PHD2. HeLa cells were stained with antibodies to FKBP38 (upper panel), PHD2 (lower panel) and the organelle markers calnexin (ER), Mitotracker (mitochondria) and WGA (Golgi), followed by fluorescently labeled secondary antibodies.

Suppl. Fig. S4. Indirect immunofluorescence of FKBP38. HeLa cells were transiently transfected with the mock control plasmid, V5-FKBP38, V5-FKBP38<sup>A98-257</sup> or V5-FKBP38<sup>1-389</sup> stained with antibodies to V5 and the organelle markers calreticulin (ER, A), Mitotracker (mitochondria, B) and WGA (Golgi, C), followed by fluorescently labeled secondary antibodies.

Supplementary Figure S1, Barth et al.

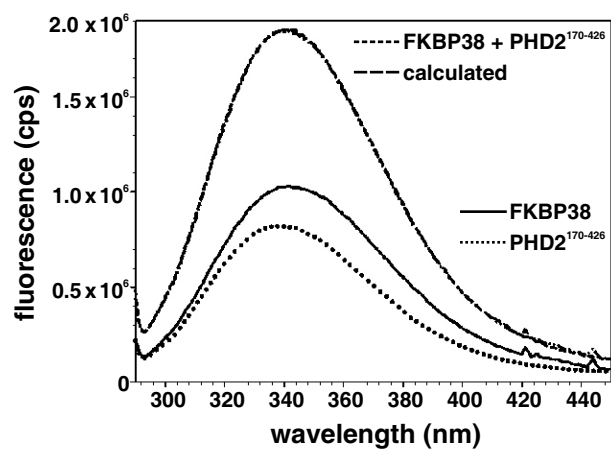

Supplementary Figure S2, Barth et al.

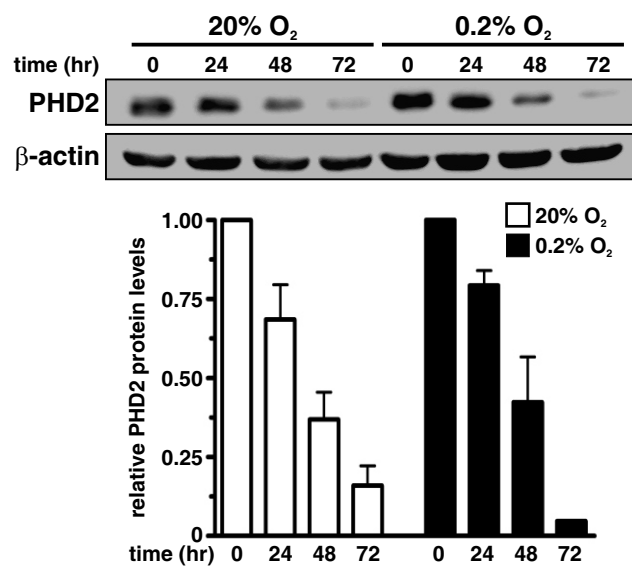

Supplementary Figure S3, Barth et al.

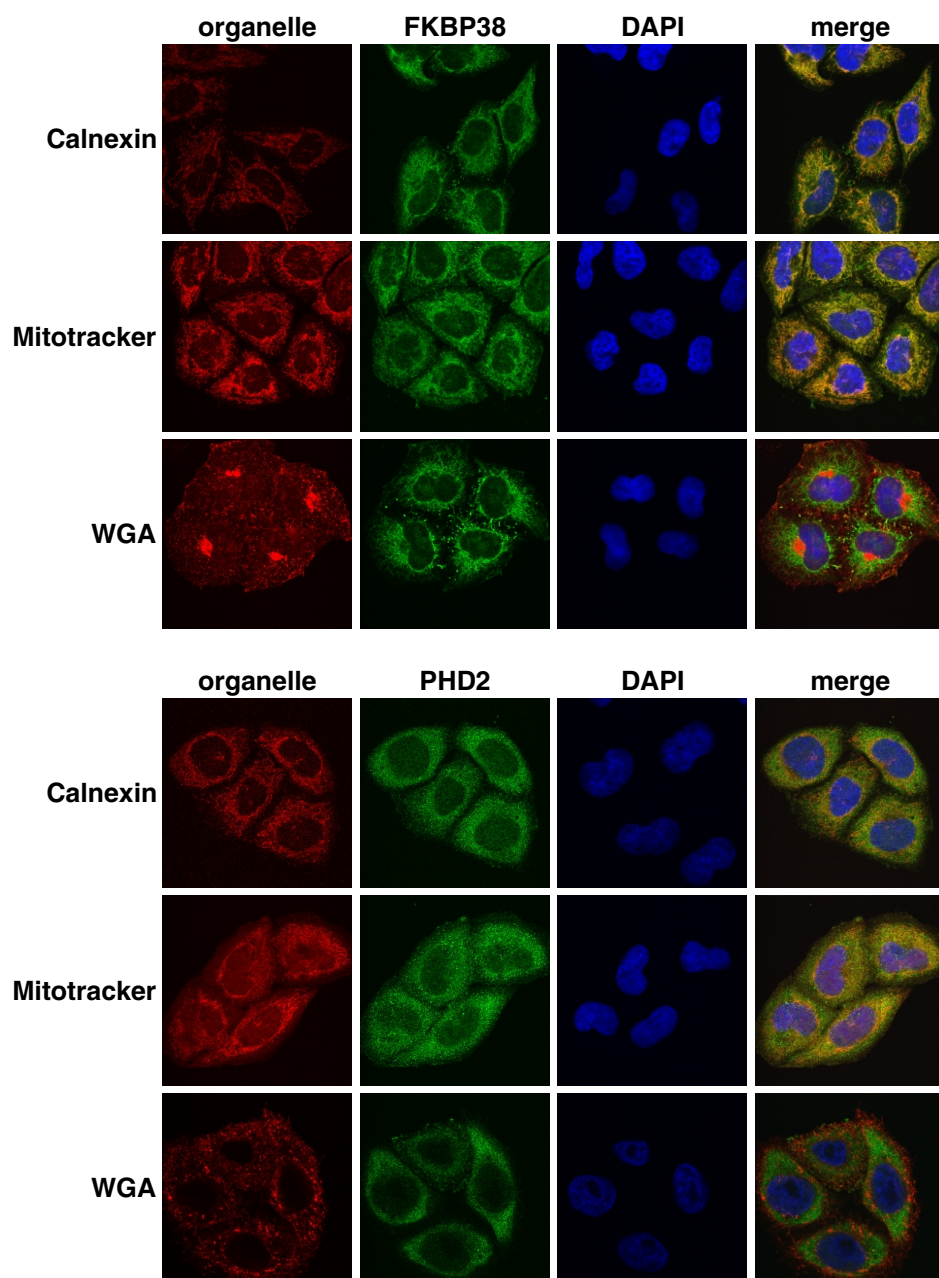

# Supplementary Figure S4, Barth et al.

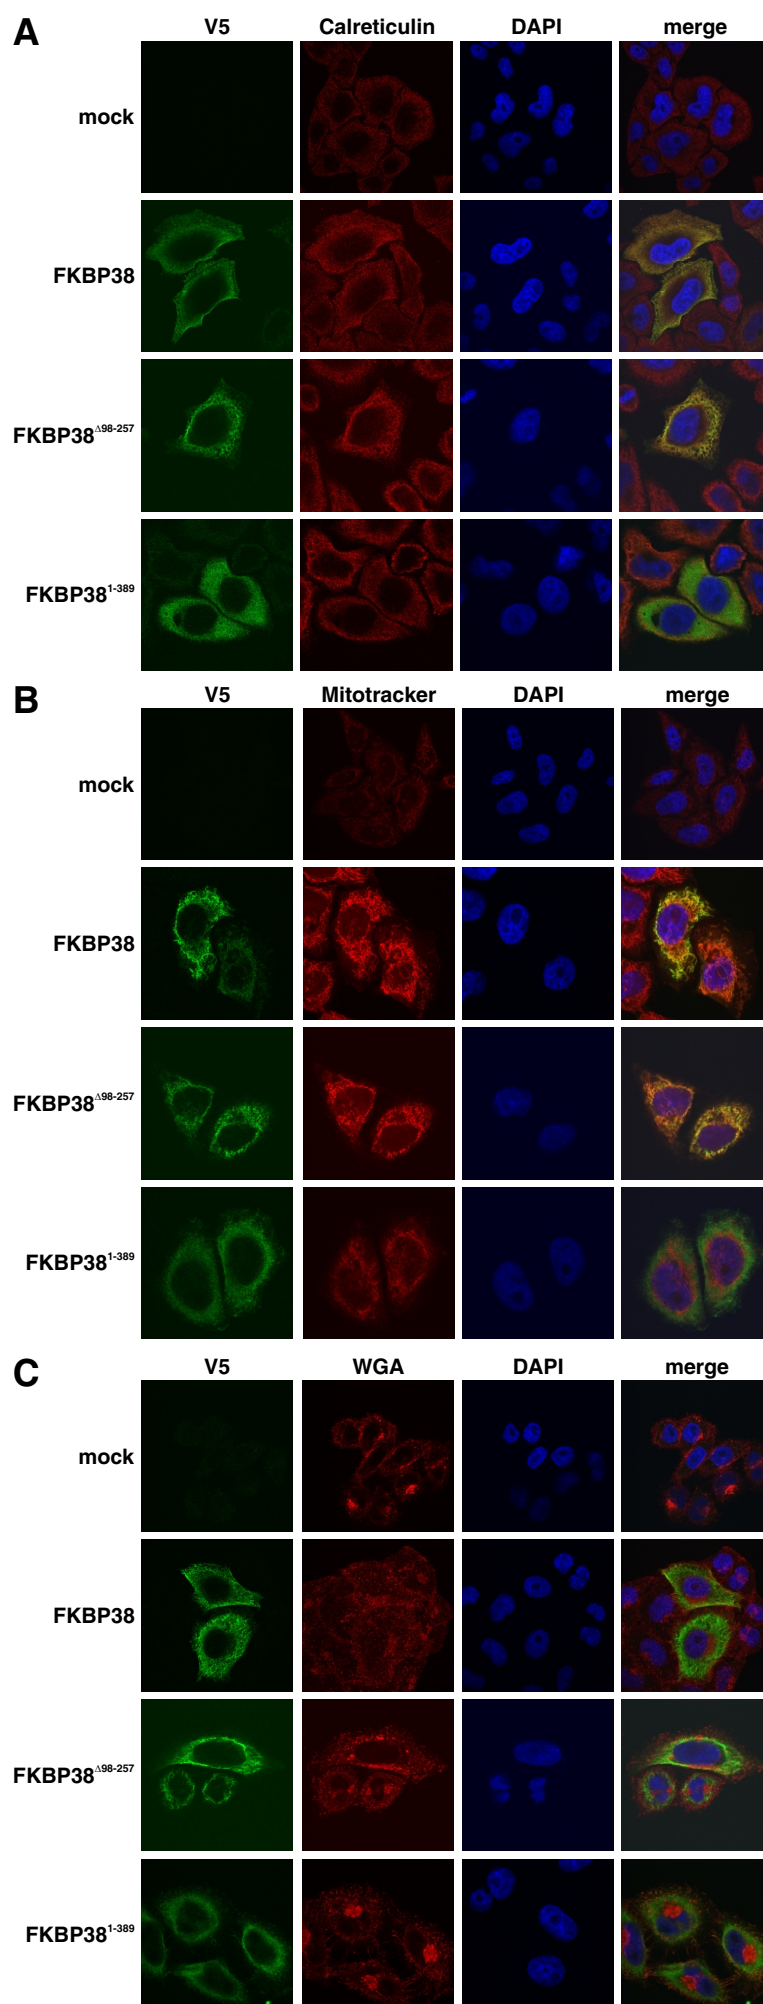

Supplement: supp_M109.032631_Suppl_data.pdf [file supp_M109.032631_Suppl_data.pdf]
